# Supplementary material for: Therapeutic targeting of p90 ribosomal S6 kinase
Source: Front Cell Dev Biol. 2023 Dec 19;11:1297292. doi: 10.3389/fcell.2023.1297292 (PMC10758423; doi:10.3389/fcell.2023.1297292)
Supplement: Supplementary file 1 [file Table2.xlsx]

## Sheet: Table S2
Table S2: Inhibitory activity of compounds against RSK
– value not reported
* IC50 values are not relevant for covalent interactions
			IC50 (nM) or % inhibition
Inhibitor	Assay Type	Concentration ATP (μM)	RSK1	RSK2	RSK3	RSK4	Reference
SL0101	activity	10	70.7	392	–	–	(Wright, et al., 2021)
SL0101	affinity		192.5	483	9.7% at 30 μM	29.1% at 30 μM	(Wright, et al., 2021)
C5” n-propyl cyclitol SL0101	activity	10	–	183	–	–	(Wright, et al., 2021)
C5” n-propyl cyclitol SL0101	affinity		–	215	–	–	(Wright, et al., 2021)
C3” carbamate, C5” n-propyl SL0101	activity	10	–	84.7	–	–	(Wright, et al., 2021)
C3” carbamate, C5” n-propyl SL0101	affinity		12.8	37.4	–	–	(Wright, et al., 2021)
C3” carbamate, C5” n-propyl cyclitol SL0101	activity	10	–	74.1	–	–	(Wright, et al., 2021)
C3” carbamate, C5” n-propyl cyclitol SL0101	affinity		–	26.3	–	–	(Wright, et al., 2021)
C3”-,C4”-bis-carbamate, C5” n-propyl SL0101	affinity		–	83.7	–	–	(Wright, et al., 2021)
C3”-,C4”-bis-carbamate, C5” n-propyl cyclitol SL0101	affinity		–	90.9	–	–	(Wright, et al., 2021)
BI-D1870	activity	100	31	24	18	15	(Sapkota, et al., 2007)
BI-D1870	affinity		–	17.3	3.9	22	(Wright, et al., 2021)
LJH685	activity	5	6	–	–	–	(Aronchik, et al., 2014)
LJH685	activity	20	–	5	–	–	(Aronchik, et al., 2014)
LJH685	activity	10	–	–	4	–	(Aronchik, et al., 2014)
LJI308	activity	5	6	–	–	–	(Aronchik, et al., 2014)
LJI308	activity	20	–	4	–	–	(Aronchik, et al., 2014)
LJI308	activity	10	–	–	13	100% at 10 μM	(Aronchik, et al., 2014)
BI-D1870 3,4-bi-aryl pyrazole 1	activity	20	–	24	–	–	(Jain, et al., 2015)
BI-D1870 3,4-bi-aryl pyrazole 26	activity	20	–	150	–	–	(Jain, et al., 2015)
BI-D1870 3,4-bi-aryl pyrazole 27	activity	20	–	2.5 μM	–	–	(Jain, et al., 2015)
BI-D1870 3,4-bi-aryl pyrazole 28	activity	20	–	53	–	–	(Jain, et al., 2015)
BI-D1870 3-difluorophenyl, 4-phenol pyrazole 29	activity	20	–	6	–	–	(Jain, et al., 2015)
BI-D1870 3,4-bi-aryl pyridine 2	activity	20	–	180	–	–	(Jain, et al., 2015)
BI-D1870 3,4-bi-aryl pyridine 46	activity	20	–	5	–	–	(Jain, et al., 2015)
BI-D1870 3,4-bi-aryl pyridine 47	activity	20	–	4	–	–	(Jain, et al., 2015)
BI-D1870 7-azaindole 11	not reported		–	2	–	–	(Jain, et al., 2018)
BI-D1870 7-azaindole 15	not reported		–	0.3	–	–	(Jain, et al., 2018)
BI-D1870 7-azaindole 16	not reported		–	2	–	–	(Jain, et al., 2018)
BI-D1870 N-substituted pteridinone 28	affinity		38.6	25.4	7.6	7.6	(Casalvieri, et al., 2020)
BI-D1870 N-substituted pteridinone 33	affinity		20.3	18.2	3.4	3.5	(Casalvieri, et al., 2020)
BI-D1870 N-substituted pteridinone 34	affinity		12.4	17.6	5.2	3.8	(Casalvieri, et al., 2020)
BI-D1870 N-substituted pteridinone 35	affinity		28	38.3	4.7	4	(Casalvieri, et al., 2020)
BI-D1870 N-substituted pteridinone 36	affinity		24.7	23.4	5.9	4.9	(Casalvieri, et al., 2020)
BI-D1870 N-substituted pteridinone 37	affinity		32.1	24.7	15.1	12.8	(Casalvieri, et al., 2020)
BI-D1870 N-substituted pyrimidine 38	affinity		–	45% at 10 μM	–	–	(Casalvieri, et al., 2020)
BI-D1870 N-substituted pyrimidine 39	affinity		–	83% at 10 μM	–	–	(Casalvieri, et al., 2020)
BI-D1870 N-substituted pyrimidine 43	affinity		–	72% at 10 μM	–	–	(Casalvieri, et al., 2020)
BI-D1870 N-substituted pyrimidine 44	affinity		–	38% at 10 μM	–	–	(Casalvieri, et al., 2020)
BI-D1870 N-substituted purine 43	affinity		–	55.5	–	–	(Casalvieri, et al., 2021)
BI-D1870 N-substituted purine 44	affinity		–	24.6	–	–	(Casalvieri, et al., 2021)
BI-D1870 N-substituted purine 45	affinity		–	18.4	–	–	(Casalvieri, et al., 2021)
BI-D1870 N-substituted purine 51	affinity		–	15.7	–	–	(Casalvieri, et al., 2021)
BI-D1870 N-substituted purine 52	affinity		–	17.8	–	–	(Casalvieri, et al., 2021)
BI-D1870 N-substituted pyrrolopyrimidine 10	affinity		–	25.7	–	–	(Casalvieri, et al., 2021)
BI-D1870 N-substituted pyrrolopyrimidine 11	affinity		–	34.7	–	–	(Casalvieri, et al., 2021)
BI-D1870 N-substituted pyrrolopyrimidine 60	affinity		–	95.8	–	–	(Casalvieri, et al., 2021)
BIX 02565 (piperazinone 24)	activity	0.75	–	1.1	–	–	(Fryer, et al., 2012; Kirrane, et al., 2012)
piperazinone 25	activity	not reported	–	14	–	–	(Kirrane, et al., 2012)
diaziepinone 26	activity	not reported	–	27	–	–	(Kirrane, et al., 2012)
BIX 02565 analogue 2	activity	0.75	–	19	–	–	(Fryer, et al., 2012)
BIX 02565 analogue 3	activity	0.75	–	21	–	–	(Fryer, et al., 2012)
BIX 02565 analogue 4	activity	0.75	–	91	–	–	(Fryer, et al., 2012)
BIX 02565 analogue 5	activity	0.75	–	240	–	–	(Fryer, et al., 2012)
BIX 02565 analogue 6	activity	0.75	–	1.1	–	–	(Fryer, et al., 2012)
BIX 02565 analogue 7	activity	0.75	–	5.5	–	–	(Fryer, et al., 2012)
BIX 02565 analogue 8	activity	0.75	–	19	–	–	(Fryer, et al., 2012)
BIX 02565 analogue 9	activity	0.75	–	4.6	–	–	(Fryer, et al., 2012)
BIX 02565 analogue 10	activity	0.75	–	4.4	–	–	(Fryer, et al., 2012)
BIX 02565 analogue 11	activity	0.75	–	53	–	–	(Fryer, et al., 2012)
BIX 02565 analogue 12	activity	0.75	–	4	–	–	(Fryer, et al., 2012)
BIX 02565 analogue 13	activity	0.75	–	0.39	–	–	(Fryer, et al., 2012)
BIX 02565 analogue 14	activity	0.75	–	30	–	–	(Fryer, et al., 2012)
BIX 02565 analogue 15	activity	0.75	–	0.2	–	–	(Fryer, et al., 2012)
moxifloxacin	affinity		–	–	–	6.31 μM	(Chrysostomou, et al., 2021)
trovafloxacin	affinity		–	–	–	2.57 μM	(Chrysostomou, et al., 2021)
rufloxacin	affinity		–	–	–	18.2 μM	(Chrysostomou, et al., 2021)
marbofloxacin	affinity		–	–	–	8.51 μM	(Chrysostomou, et al., 2021)
PMD 15	activity	20	23.6	94	6	8	(Dunn, et al., 2018)
PMD 16	activity	20	–	23	–	–	(Dunn, et al., 2018)
PMD 17	activity	20	–	14	–	–	(Dunn, et al., 2018)
PMD 18	activity	20	2	12 to 20	1.7	0.3	(Dunn, et al., 2018)
PMD 19	activity	20	–	123	–	–	(Dunn, et al., 2018)
PMD 20	activity	20	–	124	–	–	(Dunn, et al., 2018)
PMD 25	activity	20	–	18	–	–	(Dunn, et al., 2018)
fmk	activity	100	–	15*	–	–	(Cohen, et al., 2007)
fmk-BODIPY	activity	100	–	1.7 μM*	–	–	(Cohen, et al., 2007)
fmk-pa	activity	100	–	20*	–	–	(Cohen, et al., 2007)
pyrrolopyrimidine 12	activity	100	–	250	–	–	(Serafimova, et al., 2012)
pyrrolopyrimidine 13	activity	100	–	75	–	–	(Serafimova, et al., 2012)
pyrrolopyrimidine 14	activity	100	–	13	–	–	(Serafimova, et al., 2012)
N-isopropyl cyanoacrylamide (CN-NHiPr, pyrrolopyrimidine 15)	activity	100	–	7	–	–	(Serafimova, et al., 2012)
N-isopropyl cyanoacrylamide (CN-NHiPr, pyrrolopyrimidine 15)	activity	100	CTKD: 71% at 1 μM	CTKD: 5 nM	CTKD: 34% at 1 μM	CTKD: 98% at 1 μM	(Serafimova, et al., 2012)
N-isopropyl cyanoacrylamide (CN-NHiPr, pyrrolopyrimidine 15)	activity	100	NTKD: 18% at 1 μM	NTKD: 21% at 1 μM	NTKD : 22% at 1 μM	NTKD: 7% at 1 μM	(Serafimova, et al., 2012)
N-isopropyl cyanoacrylamide (CN-NHiPr, pyrrolopyrimidine 15)	affinity		CTKD KD = 0.54 nM			CTKD KD = 1.2 nM	(Serafimova, et al., 2012)
1,4-dihydro-2H-pyrimido[4,5-d][1,3]oxazin-2-one 7 (E21)	activity	10	–	–	–	117	(Yuan, et al., 2012)
1,4-dihydro-2H-pyrimido[4,5-d][1,3]oxazin-2-one 8 (E37)	activity	10	–	–	–	2.12 μM	(Yuan, et al., 2012)
1,4-dihydro-2H-pyrimido[4,5-d][1,3]oxazin-2-one 9 (E36)	activity	10	–	–	–	10.6 μM	(Yuan, et al., 2012)
1,4-dihydro-2H-pyrimido[4,5-d][1,3]oxazin-2-one 14f	activity	10	91.9% at 100 nM	99.3% at 100 nM	98.1% at 100 nM	9.5	(Yuan, et al., 2012)
kaemperfol	activity	10	–	15 μM	–	–	(Smith, et al., 2007)
eriodictyol	activity	not reported	–	–	–	–	(Liu, et al., 2011)
dimethyl fumarate	affinity		–	225 μM*	–	–	(Andersen, et al., 2018)
dibenzyl trisulfide	affinity		CTKD: 80% at 10 μM	CTKD: 33% at 10 μM	CTKD: 0%	CTKD: 29% at 10 μM	(Lowe, et al., 2014)
dibenzyl trisulfide	affinity		NTKD: 15% at 10 μM	NTKD: 0%	NTKD: 9% at 10 μM	NTKD: 7% at 10 μM	(Lowe, et al., 2014)
TAS01612	activity	30	0.9	–	–	–	(Sugimoto, et al., 2020)
prexasertib (LY2606368)	activity	not reported	9	> 10 μM	> 10 μM	–	(King, et al., 2015)
carnosol	activity	not reported	–	50% at 10 μM	–	–	(Wang, et al., 2018)
luteolin	activity	not reported	–	4.42 μM	–	–	(Reipas, et al., 2013)
AE007	affinity		–	856	–	–	(Zhao, et al., 2021)
AE007 analogue C12	affinity		–	406	–	–	(Zhao, et al., 2021)
AE007 analogue C19	affinity		–	4.76 μM	–	–	(Zhao, et al., 2021)
AE007 analogue C22	affinity		–	337	–	–	(Zhao, et al., 2021)
AE007 analogue C24	affinity		–	317	–	–	(Zhao, et al., 2021)
CX-F9			–	–	–	–	(Zhang, et al., 2019)
BRD7389	activity	not reported	1.5 μM	2.4 μM	1.2 μM	–	(Fomina, et al., 2010)
pluripotin (SC1)	activity	not reported	0.5 μM	2.5 μM	3.3 μM	10.0 μM	(Mertins, et al., 2013)

## Sheet: Table S2 References
Reference Abbreviation	Full Reference
Andersen, et al., 2018	Andersen JL, Gesser B, Funder ED, Nielsen CJF, Gotfred-Rasmussen H, Rasmussen MK, et al. Dimethyl fumarate is an allosteric covalent inhibitor of the p90 ribosomal S6 kinases. Nat Commun. 2018;9(1):4344.
Aronchik, et al., 2014	Aronchik I, Appleton BA, Basham SE, Crawford K, Rosario MD, Doyle LV, et al. Novel Potent and Selective Inhibitors of p90 Ribosomal S6 Kinase Reveal the Heterogeneity of RSK Function in MAPK-Driven Cancers. Molecular Cancer Research. 2014;12(5):803-12.
Casalvieri, et al., 2020	Casalvieri KA, Matheson CJ, Backos DS, Reigan P. Substituted pteridinones as p90 ribosomal S6 protein kinase (RSK) inhibitors: A structure-activity study. Bioorg Med Chem. 2020;28(5):115303.
Casalvieri, et al., 2021	Casalvieri KA, Matheson CJ, Warfield BM, Backos DS, Reigan P. N-Substituted pyrrolopyrimidines and purines as p90 ribosomal S6 protein kinase-2 (RSK2) inhibitors. Bioorg Med Chem. 2021;41:116220.
Chrysostomou, et al., 2021	Chrysostomou S, Roy R, Prischi F, Thamlikitkul L, Chapman KL, Mufti U, et al. Repurposed floxacins targeting RSK4 prevent chemoresistance and metastasis in lung and bladder cancer. Sci Transl Med. 2021;13(602).
Cohen, et al., 2007	Cohen MS, Hadjivassiliou H, Taunton J. A clickable inhibitor reveals context-dependent autoactivation of p90 RSK. Nat Chem Biol. 2007;3(3):156-60.
Dunn, et al., 2018	Dunn SE, Jayanthan A, Nagireddy JR, Annedi S, Drie JHV, Daynard TS, et al. Substituted tetrahydropyrido [3'2':4,5]pyrrolo[1,2-α]pyrazine-2-carboxamides as RSK inhibitors. United States patent US 10,081,632 B2. Sep. 25, 2018.
Fomina, et al., 2010	Fomina-Yadlin D, Kubicek S, Walpita D, Dancik V, Hecksher-Sorensen J, Bittker JA, et al. Small-molecule inducers of insulin expression in pancreatic alpha-cells. Proc Natl Acad Sci U S A. 2010;107(34):15099-104.
Fryer, et al., 2012	Fryer RM, Muthukumarana A, Chen RR, Smith JD, Mazurek SN, Harrington KE, et al. Mitigation of off-target adrenergic binding and effects on cardiovascular function in the discovery of novel ribosomal S6 kinase 2 inhibitors. J Pharmacol Exp Ther. 2012;340(3):492-500.
Jain, et al., 2018	Jain R, Mathur M, Lan J, Costales A, Atallah G, Ramurthy S, et al. Design and synthesis of potent RSK inhibitors. Bioorg Med Chem Lett. 2018;28(19):3197-201.
Jain, et al., 2015	Jain R, Mathur M, Lan J, Costales A, Atallah G, Ramurthy S, et al. Discovery of Potent and Selective RSK Inhibitors as Biological Probes. J Med Chem. 2015;58(17):6766-83.
King, et al., 2015	King C, Diaz HB, McNeely S, Barnard D, Dempsey J, Blosser W, et al. LY2606368 Causes Replication Catastrophe and Antitumor Effects through CHK1-Dependent Mechanisms. Mol Cancer Ther. 2015;14(9):2004-13.
Kirrane, et al., 2012	Kirrane TM, Boyer SJ, Burke J, Guo X, Snow RJ, Soleymanzadeh L, et al. Indole RSK inhibitors. Part 2: optimization of cell potency and kinase selectivity. Bioorg Med Chem Lett. 2012;22(1):738-42.
Liu, et al., 2011	Liu K, Cho YY, Yao K, Nadas J, Kim DJ, Cho EJ, et al. Eriodictyol inhibits RSK2-ATF1 signaling and suppresses EGF-induced neoplastic cell transformation. J Biol Chem. 2011;286(3):2057-66.
Lowe, et al., 2014	Lowe HI, Facey CO, Toyang NJ, Bryant JL. Specific RSK kinase inhibition by dibenzyl trisulfide and implication for therapeutic treatment of cancer. Anticancer Res. 2014;34(4):1637-41.
Ludwik, et al., 2016	Ludwik KA, Campbell JP, Li M, Li Y, Sandusky ZM, Pasic L, et al. Development of a RSK Inhibitor as a Novel Therapy for Triple-Negative Breast Cancer. Molecular Cancer Therapeutics. 2016;15(11):2598-608.
Mertins, et al., 2013	Mertins SD, Scudiero DA, Hollingshead MG, Divelbiss RD, Jr., Alley MC, Monks A, et al. A small molecule (pluripotin) as a tool for studying cancer stem cell biology: proof of concept. PLoS One. 2013;8(2):e57099.
Reipas, et al., 2013	Reipas KM, Law JH, Couto N, Islam S, Li Y, Li H, et al. Luteolin is a novel p90 ribosomal S6 kinase (RSK) inhibitor that suppresses Notch4 signaling by blocking the activation of Y-box binding protein-1 (YB-1). Oncotarget. 2013;4(2):329-45.
Sapkota, et al., 2007	Sapkota Gopal P, Cummings L, Newell Felicity S, Armstrong C, Bain J, Frodin M, et al. BI-D1870 is a specific inhibitor of the p90 RSK (ribosomal S6 kinase) isoforms in vitro and in vivo. Biochemical Journal. 2007;401(Pt 1):29-38.
Serafimova, et al., 2012	Serafimova, I.M., Pufall, M.A., Krishnan, S., Duda, K., Cohen, M.S., Maglathlin, R.L., McFarland, J.M., Miller, R.M., Frodin, M., and Taunton, J. (2012). Reversible targeting of noncatalytic cysteines with chemically tuned electrophiles. Nat Chem Biol 8, 471-476. 10.1038/nchembio.925.
Shibata, et al., 2020	Shibata T, Watari K, Kawahara A, Sudo T, Hattori S, Murakami Y, et al. Targeting Phosphorylation of Y-Box-Binding Protein YBX1 by TAS0612 and Everolimus in Overcoming Antiestrogen Resistance. Mol Cancer Ther. 2020;19(3):882-94.
Smith, et al., 2007	Smith JA, Maloney DJ, Hecht SM, Lannigan DA. Structural basis for the activity of the RSK-specific inhibitor, SL0101. Bioorg Med Chem. 2007;15(14):5018-34.
Sugimoto, et al., 2020	Sugimoto T, Sakamoto T, Yamamoto F, Kobayakawa Y, Egashira N, Ichikawa K, et al. 5H-PYRROLO [2,3-D] PYRIMIDIN-6 (7H)-ONE DERIVATIVE. United States patent US 10,538,528 B2. Jan. 21, 2020.
Wang, et al., 2018	Wang L, Zhang Y, Liu K, Chen H, Yang R, Ma X, et al. Carnosol suppresses patient-derived gastric tumor growth by targeting RSK2. Oncotarget. 2018;9(76):34200-12.
Wright, et al., 2021	Wright EB, Fukuda S, Li M, Li Y, O’Doherty GA, Lannigan DA. Identifying requirements for RSK2 specific inhibitors. Journal of Enzyme Inhibition and Medicinal Chemistry. 2021;36(1):1798-809.
Yuan, et al., 2012	Yuan, Y., Xu, J., Jiang, L., Yu, K., Ge, Y., Li, M., He, H., Niu, Q., Shi, X., Fan, L., et al. (2021). Discovery, Optimization, and Structure-Activity Relationship Study of Novel and Potent RSK4 Inhibitors as Promising Agents for the Treatment of Esophageal Squamous Cell Carcinoma. J Med Chem 64, 13572-13587. 10.1021/acs.jmedchem.1c00969.
Zhang, et al., 2019	Zhang X, Cai L, Zhao S, Long J, Li J, Wu L, et al. CX-F9, a novel RSK2 inhibitor, suppresses cutaneous melanoma cells proliferation and metastasis through regulating autophagy. Biochem Pharmacol. 2019;168:14-25.
Zhao, et al., 2021	Zhao Y, Chen RF, Deng ZK, Zhang LX, Cheng Y, Chen AF, et al. Discovery of novel p90 ribosomal S6 kinase 2 inhibitors for potential cancer treatment through ligand-based and structure-based virtual screening methods. Chemometr Intell Lab. 2021;217.
